# Supplementary material for: Adsorption properties of small gas molecules on SnSe2 monolayer supported with transition metal: first-principles calculations
Source: Royal Society of Chemistry journal article supplement (doi:10.1039/d2cp04753e), 2023-01-01
Supplement: d2cp04753e1.pdf [file d2cp04753e1.pdf]

## **Adsorption properties of small gas molecules on SnSe<sub>2</sub> monolayer supported with Transition metal: First-principles calculations**

Donglin Pang<sup>a</sup>, Pei Shi<sup>a</sup>, Long, Lin<sup>a,b,\*</sup>, Kun Xie<sup>a</sup>, Chao Deng<sup>c,\*\*</sup>, Zhanying Zhang<sup>a</sup>

<sup>a</sup> *Henan Key Laboratory of Materials on Deep-Earth Engineering, School of Materials Science and Engineering, Henan Polytechnic University, Jiaozuo, 454000, Henan, China*

<sup>b</sup> *School of Mathematics and Informatics, Henan Polytechnic University, Jiaozuo City 454003, Henan Province, China*

<sup>c</sup> *School of Physics Electronic Information, Henan Polytechnic University, Jiaozuo City 454003, Henan Province, China*

---

\*Corresponding author. E-mail: [linlong@hpu.edu.cn](mailto:linlong@hpu.edu.cn) (Long Lin).

\*Corresponding author. E-mail: [super@hpu.edu.cn](mailto:super@hpu.edu.cn) (Chao Deng).

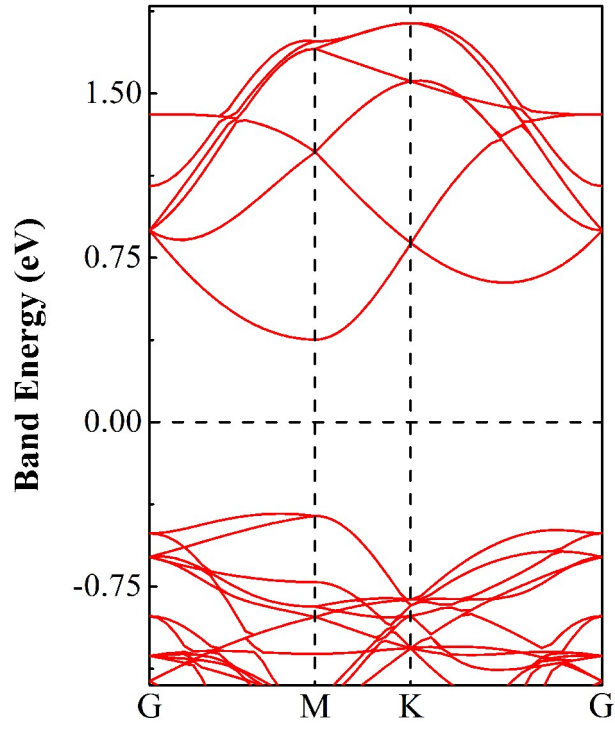

**Fig. S1.** The band structure of intrinsic SnSe<sub>2</sub>.

**Table S1.** The relevant parameters of CH<sub>4</sub> gas molecule adsorbed on TMs supported SnSe<sub>2</sub> surface. The different adsorption configuration (Models), adsorption configuration of gas molecules (State), the adsorption energy of gas molecules ( $E_{ad}$  in eV), the distance between the gas molecules and the TM supported SnSe<sub>2</sub> (Height Å), the bond length (Å) and bond angle (°) of the gas molecules after adsorption, the charge transfer (Q in e).

| Models | States | $E_{ad}$ (eV) | Height (Å) | Bond length (Å) |            |            |            | Q(e)   |
|--------|--------|---------------|------------|-----------------|------------|------------|------------|--------|
|        |        |               |            | $d_{C-Ha}$      | $d_{C-Hb}$ | $d_{C-Hc}$ | $d_{C-Hd}$ |        |
| Sc     | 1P     | -0.151        | 3.449      | 1.095           | 1.095      | 1.095      | 1.103      | -0.004 |
|        | 2P     | -0.356        | 2.789      | 1.107           | 1.095      | 1.105      | 1.095      | -0.031 |
|        | 3P     | -0.400        | 2.643      | 1.104           | 1.104      | 1.104      | 1.097      | -0.037 |
| Ti     | 1P     | -0.146        | 3.464      | 1.095           | 1.095      | 1.095      | 1.105      | -0.003 |
|        | 2P     | -0.276        | 2.835      | 1.107           | 1.096      | 1.104      | 1.095      | -0.014 |
|        | 3P     | -0.282        | 2.714      | 1.102           | 1.102      | 1.102      | 1.098      | -0.021 |
| V      | 1P     | -0.158        | 3.368      | 1.096           | 1.096      | 1.096      | 1.106      | 0.001  |
|        | 2P     | -0.272        | 2.764      | 1.109           | 1.096      | 1.103      | 1.095      | -0.005 |
|        | 3P     | -0.245        | 2.890      | 1.100           | 1.101      | 1.100      | 1.099      | -0.008 |
| Cr     | 1P     | -0.197        | 2.926      | 1.099           | 1.099      | 1.099      | 1.098      | -0.002 |
|        | 2P     | -0.231        | 2.769      | 1.108           | 1.096      | 1.103      | 1.096      | -0.011 |
|        | 3P     | -0.146        | 3.362      | 1.096           | 1.096      | 1.096      | 1.106      | -0.007 |
| Mn     | 1P     | -0.137        | 3.397      | 1.096           | 1.096      | 1.096      | 1.105      | 0.001  |
|        | 2P     | -0.195        | 3.012      | 1.103           | 1.096      | 1.101      | 1.096      | 0.001  |
|        | 3P     | -0.200        | 2.960      | 1.099           | 1.099      | 1.099      | 1.098      | 0.001  |
| Fe     | 1P     | -0.132        | 3.420      | 1.096           | 1.096      | 1.096      | 1.103      | -0.002 |
|        | 2P     | -0.171        | 3.261      | 1.110           | 1.097      | 1.099      | 1.097      | 0.006  |
|        | 3P     | -0.171        | 3.142      | 1.098           | 1.099      | 1.099      | 1.098      | 0.002  |
| Co     | 1P     | -0.131        | 3.459      | 1.096           | 1.096      | 1.096      | 1.103      | 0.002  |
|        | 2P     | -0.158        | 3.363      | 1.099           | 1.097      | 1.098      | 1.097      | 0.006  |
|        | 3P     | -0.160        | 3.320      | 1.098           | 1.098      | 1.098      | 1.098      | 0.012  |
| Ni     | 1P     | -0.132        | 3.494      | 1.096           | 1.096      | 1.096      | 1.101      | 0.003  |
|        | 2P     | -0.162        | 3.372      | 1.099           | 1.097      | 1.098      | 1.097      | 0.007  |
|        | 3P     | -0.165        | 3.330      | 1.097           | 1.098      | 1.097      | 1.097      | 0.010  |
| Cu     | 1P     | -0.125        | 3.551      | 1.097           | 1.097      | 1.097      | 1.100      | 0.004  |
|        | 2P     | -0.155        | 3.398      | 1.099           | 1.097      | 1.099      | 1.097      | 0.009  |
|        | 3P     | -0.161        | 3.294      | 1.098           | 1.098      | 1.098      | 1.098      | 0.005  |

**Table S2.** The relevant parameters of H<sub>2</sub>S gas molecule adsorbed on TMs supported SnSe<sub>2</sub> surface. The different adsorption configuration (Models), adsorption configuration of gas molecules (State), the adsorption energy of gas molecules ( $E_{ad}$  in eV), the distance between the gas molecules and the TM supported SnSe<sub>2</sub> (Height Å), the bond length (Å) and bond angle (°) of the gas molecules after adsorption, the charge transfer (Q in e).

| Models | States | $E_{ad}$ (eV) | Height (Å) | Bond length (Å) |            | Bond angle (°) | Q(e)   |
|--------|--------|---------------|------------|-----------------|------------|----------------|--------|
|        |        |               |            | $d_{S-Ha}$      | $d_{S-Hb}$ |                |        |
| Sc     | 1R     | -0.797        | 2.789      | 1.354           | 1.354      | 92.397         | -0.956 |
|        | 2R     | -0.794        | 2.759      | 1.353           | 1.354      | 92.308         | -0.087 |
|        | 3R     | -0.808        | 2.775      | 1.353           | 1.355      | 92.260         | -0.080 |
| Ti     | 1R     | -0.755        | 2.716      | 1.353           | 1.353      | 92.344         | -0.088 |
|        | 2R     | -0.783        | 2.660      | 1.353           | 1.354      | 92.407         | -0.091 |
|        | 3R     | -0.784        | 2.675      | 1.354           | 1.354      | 92.276         | -0.102 |
| V      | 1R     | -0.813        | 2.585      | 1.355           | 1.354      | 92.334         | -0.078 |
|        | 2R     | -0.837        | 2.553      | 1.354           | 1.354      | 92.386         | -0.108 |
|        | 3R     | -0.837        | 2.553      | 1.354           | 1.355      | 92.307         | -0.111 |
| Cr     | 1R     | -0.807        | 2.530      | 1.355           | 1.356      | 92.231         | -0.147 |
|        | 2R     | -0.819        | 2.515      | 1.354           | 1.355      | 92.323         | -0.124 |
|        | 3R     | -0.819        | 2.510      | 1.354           | 1.355      | 91.984         | -0.111 |
| Mn     | 1R     | -0.714        | 2.545      | 1.354           | 1.354      | 92.265         | -0.099 |
|        | 2R     | -0.735        | 2.512      | 1.353           | 1.354      | 92.323         | -0.124 |
|        | 3R     | -0.735        | 2.517      | 1.354           | 1.354      | 92.255         | -0.139 |
| Fe     | 1R     | -0.721        | 2.402      | 1.356           | 1.356      | 92.171         | -0.109 |
|        | 2R     | -0.749        | 2.383      | 1.355           | 1.356      | 92.203         | -0.130 |
|        | 3R     | 0.748         | 2.386      | 1.355           | 1.356      | 92.096         | -0.153 |
| Co     | 1R     | -0.723        | 2.310      | 1.359           | 1.359      | 91.679         | -0.082 |
|        | 2R     | -0.734        | 2.307      | 1.356           | 1.358      | 91.560         | -0.181 |
|        | 3R     | -0.733        | 2.309      | 1.356           | 1.359      | 91.692         | -0.166 |
| Ni     | 1R     | -0.678        | 2.302      | 1.358           | 1.358      | 91.780         | -0.098 |
|        | 2R     | -0.690        | 2.300      | 1.356           | 1.357      | 91.758         | -0.189 |
|        | 3R     | -0.687        | 2.301      | 1.355           | 1.357      | 91.612         | -0.175 |
| Cu     | 1R     | -0.520        | 2.422      | 1.354           | 1.353      | 92.245         | -0.107 |
|        | 2R     | -0.536        | 2.407      | 1.353           | 1.354      | 92.022         | -0.174 |
|        | 3R     | -0.533        | 2.409      | 1.353           | 1.354      | 92.012         | -0.165 |

**Table S3.** The relevant parameters of SO<sub>2</sub> gas molecule adsorbed on TMs supported SnSe<sub>2</sub> surface. The different adsorption configuration (Models), adsorption configuration of gas molecules (State), the adsorption energy of gas molecules ( $E_{ad}$  in eV), the distance between the gas molecules and the TM supported SnSe<sub>2</sub> (Height Å), the bond length (Å) and bond angle (°) of the gas molecules after adsorption, the charge transfer (Q in e).

| Models | States | $E_{ad}$ (eV) | Height (Å) | Bond length (Å) |            | Bond angle (°) | Q(e)  |
|--------|--------|---------------|------------|-----------------|------------|----------------|-------|
|        |        |               |            | $d_{S-O1}$      | $d_{S-O2}$ |                |       |
| Sc     | 1S     | -1.613        | 2.757      | 1.546           | 1.546      | 102.660        | 0.623 |
|        | 2S     | -0.322        | 2.703      | 1.456           | 1.458      | 121.284        | 0.279 |
|        | 3S     | -1.609        | 2.757      | 1.549           | 1.543      | 102.767        | 0.621 |
| Ti     | 1S     | -1.199        | 2.737      | 1.466           | 1.595      | 111.726        | 0.474 |
|        | 2S     | -0.427        | 2.528      | 1.455           | 1.457      | 120.387        | 0.287 |
|        | 3S     | -1.285        | 2.744      | 1.552           | 1.543      | 100.495        | 0.596 |
| V      | 1S     | -0.563        | 2.395      | 1.454           | 1.453      | 119.644        | 0.224 |
|        | 2S     | -0.561        | 2.393      | 1.453           | 1.454      | 119.632        | 0.269 |
|        | 3S     | -0.991        | 2.752      | 1.546           | 1.521      | 102.182        | 0.525 |
| Cr     | 1S     | -0.497        | 2.369      | 1.452           | 1.452      | 119.982        | 0.235 |
|        | 2S     | -0.496        | 2.372      | 1.451           | 1.452      | 119.844        | 0.190 |
|        | 3S     | -0.635        | 2.727      | 1.542           | 1.544      | 100.190        | 0.580 |
| Mn     | 1S     | -0.403        | 2.292      | 1.454           | 1.454      | 119.607        | 0.243 |
|        | 2S     | -0.409        | 2.287      | 1.453           | 1.455      | 119.685        | 0.290 |
|        | 3S     | -0.421        | 3.307      | 1.461           | 1.514      | 115.619        | 0.302 |
| Fe     | 1S     | -0.680        | 2.153      | 1.453           | 1.453      | 118.190        | 0.233 |
|        | 2S     | -0.678        | 2.152      | 1.453           | 1.454      | 118.149        | 0.176 |
|        | 3S     | -0.695        | 3.331      | 1.460           | 1.180      | 116.180        | 0.273 |
| Co     | 1S     | -0.149        | 3.719      | 1.449           | 1.449      | 118.887        | 0.038 |
|        | 2S     | -0.613        | 2.130      | 1.451           | 1.452      | 118.234        | 0.203 |
|        | 3S     | -0.523        | 3.264      | 1.499           | 1.457      | 117.162        | 0.227 |
| Ni     | 1S     | -0.151        | 3.712      | 1.449           | 1.449      | 118.856        | 0.037 |
|        | 2S     | -0.476        | 2.154      | 1.450           | 1.450      | 118.673        | 0.175 |
|        | 3S     | -0.390        | 3.268      | 1.487           | 1.453      | 117.600        | 0.150 |
| Cu     | 1S     | -0.180        | 3.228      | 1.450           | 1.450      | 119.085        | 0.072 |
|        | 2S     | -0.215        | 2.929      | 1.451           | 1.451      | 119.074        | 0.113 |
|        | 3S     | -0.282        | 3.381      | 1.478           | 1.453      | 117.559        | 0.147 |

**Table S4.** The relevant parameters of CO gas molecule adsorbed on TMs supported SnSe<sub>2</sub> surface. The different adsorption configuration (Models), adsorption configuration of gas molecules (State), the adsorption energy of gas molecules ( $E_{ad}$  in eV), the distance between the gas molecules and the TM supported SnSe<sub>2</sub> (Height Å), the bond length (Å) and bond angle (°) of the gas molecules after adsorption, the charge transfer (Q in e).

| Models | States | $E_{ad}$ (eV) | Height (Å) | Bond length (Å) |  | Q(e)   |
|--------|--------|---------------|------------|-----------------|--|--------|
|        |        |               |            | $d_{C-O}$       |  |        |
| Sc     | 1T     | -0.311        | 2.429      | 1.150           |  | -0.002 |
|        | 2T     | -0.625        | 2.424      | 1.143           |  | 0.041  |
|        | 3T     | -0.313        | 2.446      | 1.150           |  | 0.007  |
| Ti     | 1T     | -0.818        | 2.203      | 1.151           |  | 0.136  |
|        | 2T     | -0.817        | 2.205      | 1.150           |  | 0.128  |
|        | 3T     | -0.225        | 2.434      | 1.150           |  | 0.009  |
| V      | 1T     | -1.152        | 2.030      | 1.151           |  | 0.195  |
|        | 2T     | -1.154        | 2.026      | 1.156           |  | 0.125  |
|        | 3T     | -0.258        | 2.261      | 1.153           |  | 0.065  |
| Cr     | 1T     | -1.093        | 2.003      | 1.153           |  | 0.103  |
|        | 2T     | -1.095        | 2.006      | 1.153           |  | 0.147  |
|        | 3T     | -0.207        | 2.335      | 1.150           |  | 0.024  |
| Mn     | 1T     | -0.925        | 1.929      | 1.156           |  | 0.169  |
|        | 2T     | -0.926        | 1.192      | 1.156           |  | 0.210  |
|        | 3T     | -0.120        | 2.935      | 1.145           |  | 0.011  |
| Fe     | 1T     | -0.093        | 3.492      | 1.144           |  | 0.018  |
|        | 2T     | -1.507        | 1.788      | 1.163           |  | 0.090  |
|        | 3T     | -0.101        | 2.996      | 1.145           |  | 0.011  |
| Co     | 1T     | -0.096        | 3.538      | 1.144           |  | 0.015  |
|        | 2T     | -1.423        | 1.774      | 1.160           |  | 0.021  |
|        | 3T     | -0.091        | 2.996      | 1.144           |  | 0.012  |
| Ni     | 1T     | -0.098        | 3.559      | 1.144           |  | 0.015  |
|        | 2T     | -1.229        | 1.788      | 1.156           |  | 0.042  |
|        | 3T     | -0.091        | 2.996      | 1.144           |  | 0.011  |
| Cu     | 1T     | -0.097        | 3.652      | 1.144           |  | 0.013  |
|        | 2T     | -0.632        | 1.889      | 1.148           |  | -0.032 |
|        | 3T     | -0.090        | 3.150      | 1.144           |  | 0.011  |

**Table S5.** The relevant parameters of H<sub>2</sub>O gas molecule adsorbed on TMs supported SnSe<sub>2</sub> surface. The different adsorption configuration (Models), adsorption configuration of gas molecules (State), the adsorption energy of gas molecules ( $E_{ad}$  in eV), the distance between the gas molecules and the TM supported SnSe<sub>2</sub> (Height Å), the bond length (Å) and bond angle (°) of the gas molecules after adsorption, the charge transfer (Q in e).

| Models | States | $E_{ad}$ (eV) | Height (Å) | Bond length (Å) |             | Bond angle (°) | Q(e)   |
|--------|--------|---------------|------------|-----------------|-------------|----------------|--------|
|        |        |               |            | $d_{H_a-O}$     | $d_{H_b-O}$ |                |        |
| Sc     | 1U     | -1.093        | 2.251      | 0.977           | 0.977       | 106.940        | -0.060 |
|        | 2U     | -1.068        | 2.231      | 0.976           | 0.974       | 108.643        | -0.062 |
|        | 3U     | -1.071        | 2.235      | 0.977           | 0.974       | 108.526        | -0.059 |
| Ti     | 1U     | -0.964        | 2.215      | 0.978           | 0.978       | 107.244        | -0.056 |
|        | 2U     | -0.918        | 2.195      | 0.975           | 0.974       | 108.928        | -0.068 |
|        | 3U     | -0.968        | 2.214      | 0.979           | 0.978       | 107.090        | -0.056 |
| V      | 1U     | 0.899         | 2.169      | 0.977           | 0.978       | 107.476        | -0.058 |
|        | 2U     | -0.752        | 2.170      | 0.978           | 0.978       | 107.286        | -0.057 |
|        | 3U     | -0.860        | 2.163      | 0.974           | 0.974       | 108.961        | -0.062 |
| Cr     | 1U     | -0.816        | 2.171      | 0.977           | 0.978       | 106.936        | -0.041 |
|        | 2U     | -0.816        | 2.171      | 0.978           | 0.978       | 106.682        | -0.061 |
|        | 3U     | -0.816        | 2.167      | 0.978           | 0.978       | 106.786        | -0.058 |
| Mn     | 1U     | -0.745        | 2.173      | 0.977           | 0.978       | 106.926        | -0.054 |
|        | 2U     | -0.699        | 2.145      | 0.974           | 0.974       | 109.344        | -0.074 |
|        | 3U     | -0.748        | 2.179      | 0.978           | 0.978       | 106.615        | -0.052 |
| Fe     | 1U     | -0.667        | 2.160      | 0.978           | 0.978       | 106.731        | -0.070 |
|        | 2U     | -0.668        | 2.156      | 0.978           | 0.978       | 106.637        | -0.055 |
|        | 3U     | -0.668        | 2.156      | 0.978           | 0.978       | 106.614        | -0.049 |
| Co     | 1U     | -0.563        | 2.162      | 0.978           | 0.978       | 106.207        | -0.064 |
|        | 2U     | -0.562        | 2.160      | 0.979           | 0.979       | 106.071        | -0.047 |
|        | 3U     | -0.561        | 2.162      | 0.978           | 0.978       | 106.120        | -0.047 |
| Ni     | 1U     | -0.510        | 2.153      | 0.978           | 0.978       | 106.028        | -0.048 |
|        | 2U     | -0.509        | 2.152      | 0.978           | 0.978       | 105.990        | -0.067 |
|        | 3U     | -0.509        | 2.154      | 0.978           | 0.978       | 106.029        | -0.043 |
| Cu     | 1U     | -0.454        | 2.199      | 0.977           | 0.978       | 105.894        | -0.068 |
|        | 2U     | -0.455        | 2.198      | 0.978           | 0.978       | 105.736        | -0.059 |
|        | 3U     | -0.454        | 2.192      | 0.978           | 0.978       | 105.901        | -0.043 |

**Table S6.** The relevant parameters of NO gas molecule adsorbed on TMs supported SnSe<sub>2</sub> surface. The different adsorption configuration (Models), adsorption configuration of gas molecules (State), the adsorption energy of gas molecules ( $E_{ad}$  in eV), the distance between the gas molecules and the TM supported SnSe<sub>2</sub> (Height Å), the bond length (Å) and bond angle (°) of the gas molecules after adsorption, the charge transfer (Q in e).

| Models | States | $E_{ad}$ (eV) | Height (Å) | Bond length (Å) |           | Q(e)   |
|--------|--------|---------------|------------|-----------------|-----------|--------|
|        |        |               |            |                 | $d_{N-O}$ |        |
| Sc     | 1Y     | -1.137        | 2.166      |                 | 1.245     | 0.465  |
|        | 2Y     | -1.459        | 2.044      |                 | 1.199     | 0.423  |
|        | 3Y     | -1.016        | 2.014      |                 | 1.232     | 0.419  |
| Ti     | 1Y     | -1.604        | 1.897      |                 | 1.266     | 0.524  |
|        | 2Y     | -1.834        | 1.904      |                 | 1.193     | 0.346  |
|        | 3Y     | -1.127        | 1.942      |                 | 1.221     | 0.341  |
| V      | 1Y     | -2.432        | 1.752      |                 | 1.193     | 0.320  |
|        | 2Y     | -2.433        | 1.752      |                 | 1.193     | 0.371  |
|        | 3Y     | -0.941        | 1.894      |                 | 1.204     | 0.263  |
| Cr     | 1Y     | -2.315        | 1.669      |                 | 1.189     | 0.380  |
|        | 2Y     | -2.316        | 1.699      |                 | 1.189     | 0.247  |
|        | 3Y     | -0.492        | 1.990      |                 | 1.198     | 0.185  |
| Mn     | 1Y     | -2.276        | 1.681      |                 | 1.185     | 0.328  |
|        | 2Y     | -2.276        | 1.682      |                 | 1.185     | 0.196  |
|        | 3Y     | -0.095        | 2.968      |                 | 1.174     | 0.032  |
| Fe     | 1Y     | -2.423        | 1.663      |                 | 1.177     | 0.188  |
|        | 2Y     | -2.423        | 1.662      |                 | 1.177     | 0.246  |
|        | 3Y     | -0.930        | 1.804      |                 | 1.187     | 0.259  |
| Co     | 1Y     | -2.161        | 1.649      |                 | 1.173     | 0.102  |
|        | 2Y     | -2.160        | 1.649      |                 | 1.173     | 0.179  |
|        | 3Y     | 0.089         | 3.002      |                 | 1.167     | -0.031 |
| Ni     | 1Y     | -1.187        | 1.688      |                 | 1.169     | 0.025  |
|        | 2Y     | -1.205        | 1.170      |                 | 1.171     | 0.112  |
|        | 3Y     | -0.163        | 2.748      |                 | 1.169     | -0.016 |
| Cu     | 1Y     | -0.630        | 1.976      |                 | 1.177     | 0.096  |
|        | 2Y     | -0.124        | 3.005      |                 | 1.167     | -0.025 |
|        | 3Y     | -0.092        | 3.196      |                 | 1.166     | -0.041 |
